# Supplementary material for: Considerable humidity response of a well-aligned SOMS micro-wire flexible sensor by moisture-induced releasing of trapped electrons
Source: Royal Society of Chemistry journal article supplement (doi:10.1039/c7dt02366a), 2017-01-01

Electronic Supplementary Material (ESI) for Dalton Transactions.  
This journal is © The Royal Society of Chemistry 2017

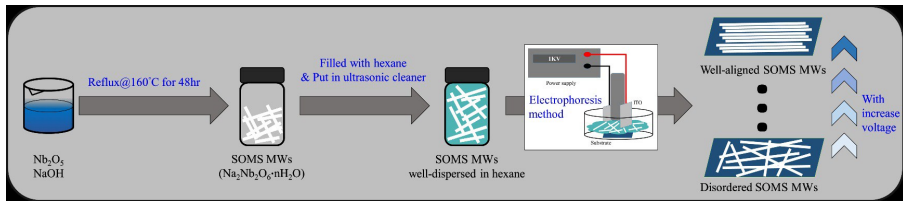

Supplement: c7dt02366a8.pdf [file c7dt02366a8.pdf]
