# Supplementary figures and images for: Considerable humidity response of a well-aligned SOMS micro-wire flexible sensor by moisture-induced releasing of trapped electrons
Source: Royal Society of Chemistry journal article supplement (doi:10.1039/c7dt02366a), 2017-01-01

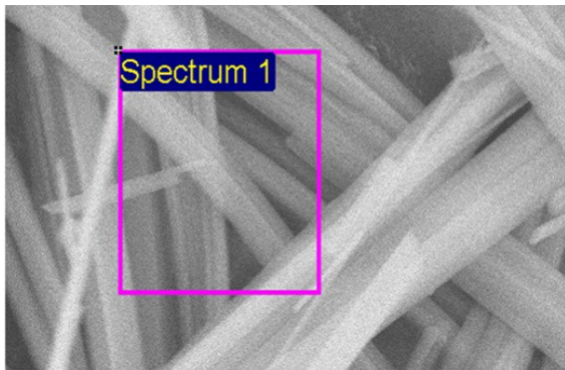

6µm

Electron Image 1

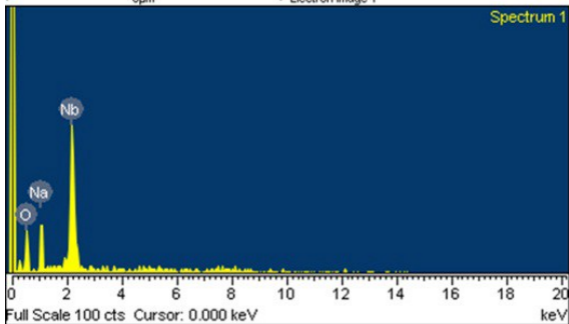

Supplement: c7dt02366a3.pdf [file c7dt02366a3.pdf]

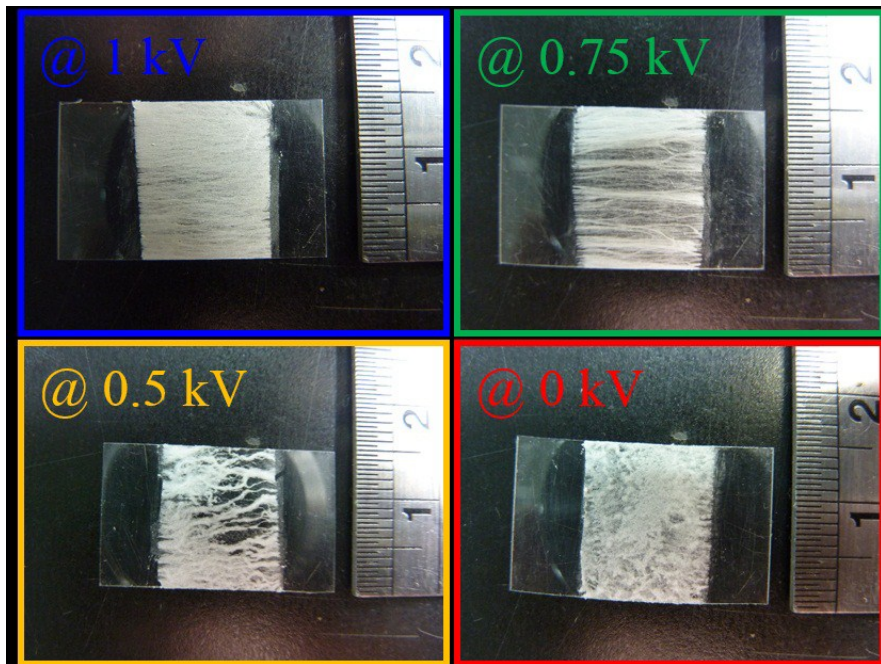

Supplement: c7dt02366a7.pdf [file c7dt02366a7.pdf]
